# Supplementary material for: Identification of regulatory elements from nascent transcription using dREG
Source: HighWire-hosted journal article supplement (doi:10.1101/gr.238279.118), 2018-12-20
Supplement: Supplemental_Table_S1.docx [file Supplemental_Table_S1.docx]

| **Data ID** | **Cell line** | **Mapped Reads** | **Informative Sites** | **GEO** | **Protocol** | **Reference** | **Role** |
| --- | --- | --- | --- | --- | --- | --- | --- |
| G1 | K562 | 374,946,808 | 17,120,769 | GSM1480327 | PRO-seq | (Core et al. 2014) | Training |
| G2 | K562 | 18,129,333 | 4,189,045 | GSM1480325 | GRO-seq | (Core et al. 2014) | Training |
| G3 | K562 | 57,520,888 | 9,201,344 | GSM3452725 | PRO-seq | Herein | Training |
| G5 | K562 | 71,452,942 | 8,678,964 | GSM2361442  GSM2361443 | PRO-seq | [(Vihervaara et al. 2017)](https://paperpile.com/c/CQYcsv/v2Yw) | Training |
| G6 | K562 | 26,972,822 | 5,890,140 | GSM2545324 | PRO-seq | [(Dukler et al. 2017)](https://paperpile.com/c/CQYcsv/SPNT) | Training |
| G7 | K562 | 27,046,373 | 5,839,230 | GSM2545325 | PRO-seq | [(Dukler et al. 2017)](https://paperpile.com/c/CQYcsv/SPNT) | Holdout |
| G8 | K562 | 49,159,579 | 9,813,838 | GSM1622612  GSM1622613  GSM1622614  GSM1622615 | GRO-seq | (Niskane et al. 2015) | Holdout |
| GM | GM12878 | 105,936,649 | 9,738,488 | GSM1480326 | GRO-seq | (Core et al. 2014) | Holdout |
| GH | HCT116 | 118,728,260 | 11,660,354 | GSM1304424  GSM1304425 | GRO-seq | (Allen et al, 2014) | Holdout |
| CD4 | CD4 | 33,087,414 | 4,952,646 | GSM2265095 | PRO-seq | [(Danko et al. 2018)](https://paperpile.com/c/CQYcsv/MnkV) | Holdout |
| MCF7 | MCF-7 | 92,614,853 | 10,913,834 | GSM1014637  GSM1014638  GSM1014637  GSM1014638  GSM1014639 | GRO-seq | [(Hah et al. 2011; Danko et al. 2013)](https://paperpile.com/c/CQYcsv/8nZV+vqWH) | Holdout |
| H1 | HELA | 5,812,515 | 1,629,415 | GSE62046 | GRO-seq | (Andersson et al. 2014) | Holdout |
| H2 | HELA | 97,917,818 | 4,690,367 | GSM1474225 | mNET-seq | [(Nojima et al. 2015)](https://paperpile.com/c/CQYcsv/O8cyj) | Holdout |
| H3 | HELA | 80,739,276 | 20,385,352 | GSM1505438  GSM1505439 | mNET-seq | [(Mayer et al. 2015)](https://paperpile.com/c/CQYcsv/9EYa5) | Holdout |

**Supplemental Table S1: Sources of PRO-seq data used in dREG model training and evaluation.** Columns show the data identification number, cell line, number of mapped sequence reads, informative sites in which dREG scores were computed, reference, and the role (training or holdout validation) in this particular study.
